# Supplementary material for: Species complex delimitations in the genus Hedychium: A machine learning approach for cluster discovery
Source: PubMed Central journal article supplement (PMC7394710; doi:10.1002/aps3.11377), 2020-07-31

**APPENDIX S1.** Dependence of standard deviation in the value of  $k$ -means objective function on the number of  $k$ -means executions.

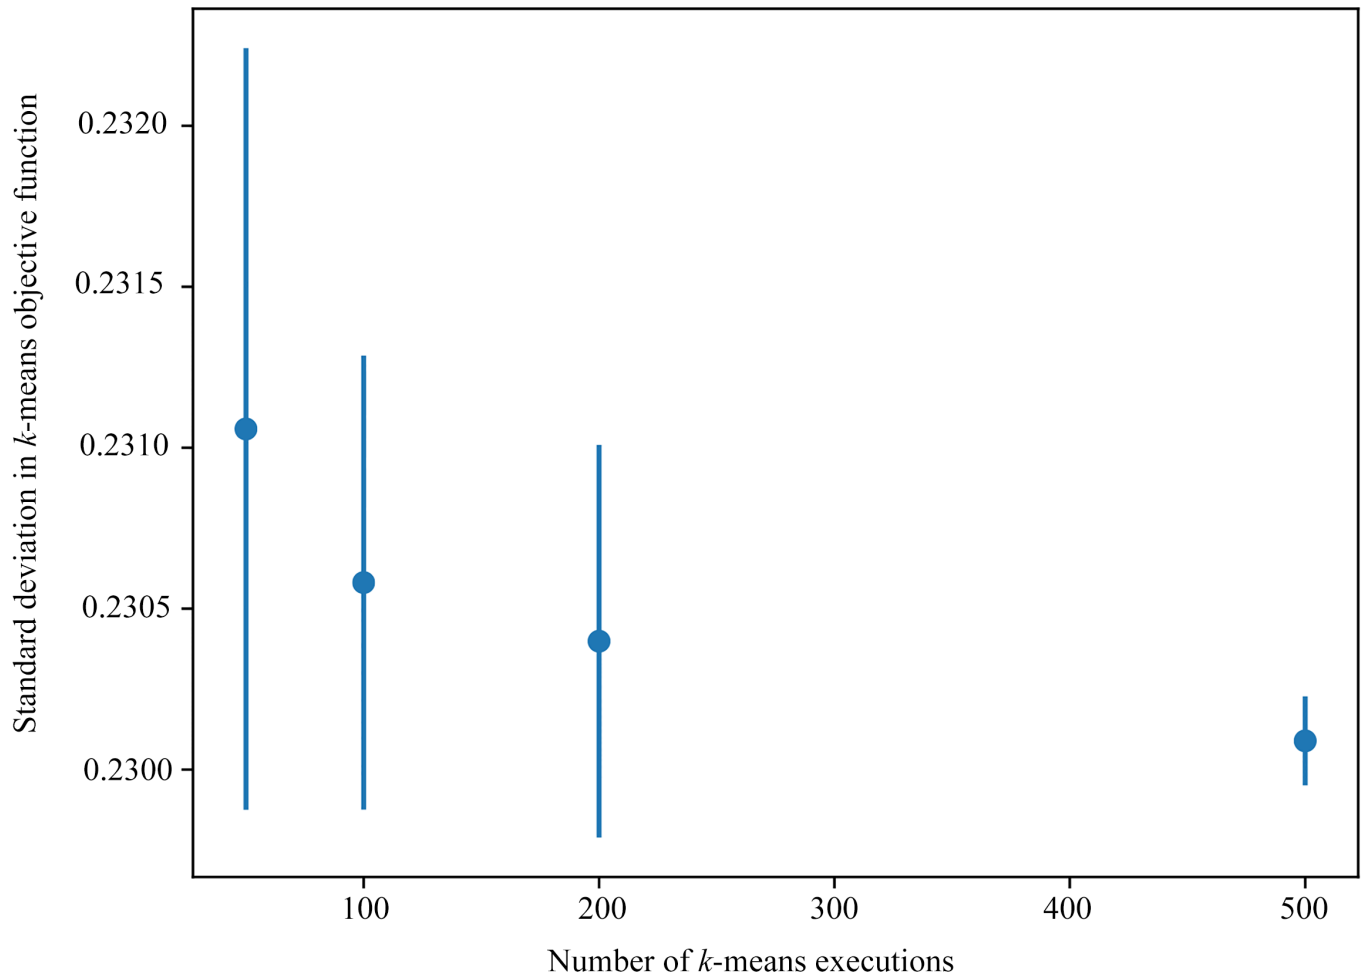

Supplement: APS3-8-e11377-s001.pdf [file APS3-8-e11377-s001.pdf]
